# Supplementary material
Source: ML conference proceedings conference paper supplement (https://proceedings.neurips.cc/paper_files/paper/2021/hash/092cb13c22d51c22b9035a2b4fe76b00-Abstract.html)
Supplement: Supplementary file 1 [file 092cb13c22d51c22b9035a2b4fe76b00-Supplemental.pdf]

---

# [Supplementary Material]

## Learning to Adapt via Latent Domains for Adaptive Semantic Segmentation

---

Anonymous Author(s)

Affiliation

Address

email

### 1 A Appendix

2 In the supplementary material, we provide more experimental results summarized as follows:

- 3 • In A.1, we use ResNet101 as the backbone network and compare our method with state-of-  
4 the-art methods, demonstrating that our method achieves consistent top results on different  
5 backbones.
- 6 • In A.2, we provide more t-SNE visualization results for a comprehensive analysis on the  
7 feature space learned from different models.
- 8 • In A.3, we study the effect of the image-to-image translation model on the performance of  
9 domain adaptive semantic segmentation.
- 10 • In A.4, we discuss the limitations of our method and provide the URL link of code to  
11 reproduce the main experimental results.

#### 12 A.1 Comparison with State-of-the-art Methods

13 In the main paper, we report results using VGG16  
14 as the backbone for both settings: single-target  
15 and multi-target domain adaptation. Here we  
16 further provide comparisons on ResNet101 [1].

17 For the single-target setting, in Table 2, we compare  
18 our method with 13 state-of-the-art methods,  
19 which all use ResNet101 as the backbone. It  
20 can be seen that our method for single-target  
21 domain adaptation (STDA) achieves 51.9% on  
22 mIoU, outperforming previous state-of-the-art  
23 methods. These results further demonstrate that  
24 our proposed method achieves consistent top  
25 results on different backbones.

26 For the multi-target setting, since previous methods do not provide results on ResNet101, in Table 1  
27 we report our results on ResNet101 to show that further improvements of 4.7% (w.r.t mIoU) can be  
28 obtained on a stronger backbone.

29 We also provide some qualitative semantic segmentation results in Figure. 1, where we observe  
30 obvious improvements against the source only method. These quantitative and qualitative results  
31 demonstrate the effectiveness of our method built on different backbone networks.

Table 1: Comparison with state-of-the-art methods on multi-target domain adaptation. “*V*” and “*R*” indicate the method using VGG16 and ResNet101 backbone networks, respectively.

| Method          | Backbone | rainy       | snowy       | cloudy      | overcast    | Average     |
|-----------------|----------|-------------|-------------|-------------|-------------|-------------|
| OCDA [2]        | <i>V</i> | 22.0        | 22.9        | 27.0        | 27.9        | 25.0        |
| DHA [3]         | <i>V</i> | 27.0        | 26.3        | 30.7        | 32.8        | 29.2        |
| <b>Our MTDA</b> | <i>V</i> | <b>31.5</b> | <b>30.2</b> | <b>33.0</b> | <b>35.0</b> | <b>33.2</b> |
| <b>Our MTDA</b> | <i>R</i> | <b>32.3</b> | <b>33.3</b> | <b>39.2</b> | <b>41.9</b> | <b>37.9</b> |

Table 2: Comparison with state-of-the-art methods (ResNet101) for single-target domain adaptation.

| Method          | road        | sidewalk    | building    | wall        | fence       | pole        | light       | sign        | veg.        | terrain     | sky         | person      | rider       | car         | truck       | bus         | train      | motor       | bike        | mIoU        |
|-----------------|-------------|-------------|-------------|-------------|-------------|-------------|-------------|-------------|-------------|-------------|-------------|-------------|-------------|-------------|-------------|-------------|------------|-------------|-------------|-------------|
| LSE [4]         | 90.2        | 40.0        | 83.5        | 31.9        | 26.4        | 32.6        | 38.7        | 37.5        | 81.0        | 34.2        | 84.6        | 61.6        | 33.4        | 82.5        | 32.8        | 45.9        | 6.7        | 29.1        | 30.6        | 47.5        |
| PLCA [5]        | 84.0        | 30.4        | 82.4        | 35.3        | 24.8        | 32.2        | 36.8        | 24.5        | 85.5        | 37.2        | 78.6        | 66.9        | 32.8        | 85.5        | 40.4        | 48.0        | 8.8        | 29.8        | 41.8        | 47.7        |
| BDL [6]         | 91.0        | 44.7        | 84.2        | 34.6        | 27.6        | 30.2        | 36.0        | 36.0        | 85.0        | 43.6        | 83.0        | 58.6        | 31.6        | 83.3        | 35.3        | 49.7        | 3.3        | 28.8        | 35.6        | 48.5        |
| CrCDA [7]       | 92.4        | 55.3        | 82.3        | 31.2        | 29.1        | 32.5        | 33.2        | 35.6        | 83.5        | 34.8        | 84.2        | 58.9        | 32.2        | 84.7        | 40.6        | 46.1        | 2.1        | 31.1        | 32.7        | 48.6        |
| DTST [8]        | 90.6        | 44.7        | 84.8        | 34.3        | 28.7        | 31.6        | 35.0        | 37.6        | 84.7        | 43.3        | 85.3        | 57.0        | 31.5        | 83.8        | 42.6        | 48.5        | 1.9        | 30.4        | 39.0        | 49.2        |
| LDR [9]         | 90.8        | 41.4        | 84.7        | 35.1        | 27.5        | 31.2        | 38.0        | 32.8        | 85.6        | 42.1        | 84.9        | 59.6        | 34.4        | 85.0        | 42.8        | 52.7        | 3.4        | 30.9        | 38.1        | 49.5        |
| CCM [10]        | 93.5        | 57.6        | 84.6        | 39.3        | 24.1        | 25.2        | 35.0        | 17.3        | 85.0        | 40.6        | 86.5        | 58.7        | 28.7        | 85.8        | 49.0        | 56.4        | 5.4        | 31.9        | 43.2        | 49.9        |
| FADA [11]       | 91.0        | 50.6        | 86.0        | 43.4        | 29.8        | 36.8        | 43.4        | 25.0        | 86.8        | 38.3        | 87.4        | 64.0        | 38.0        | 85.2        | 31.6        | 46.1        | 6.5        | 25.4        | 37.1        | 50.1        |
| LTIR [12]       | 92.0        | 55.0        | 85.3        | 34.2        | 31.1        | 34.9        | 40.7        | 34.0        | 85.2        | 40.1        | 87.1        | 61.0        | 31.1        | 82.5        | 32.3        | 42.9        | 0.3        | 36.4        | 46.1        | 50.2        |
| CAG [13]        | 90.4        | 51.6        | 83.8        | 34.2        | 27.8        | 38.4        | 25.3        | 48.4        | 85.4        | 38.2        | 78.1        | 58.6        | 34.6        | 84.7        | 21.9        | 42.7        | 41.1       | 29.3        | 37.2        | 50.2        |
| FDA [14]        | 92.5        | 53.3        | 82.4        | 26.5        | 27.6        | 36.4        | 40.6        | 38.9        | 82.3        | 39.8        | 78.0        | 62.6        | 34.4        | 84.9        | 34.1        | 53.1        | 16.9       | 27.7        | 46.4        | 50.5        |
| PCE [15]        | 91.0        | 49.2        | 85.6        | 37.2        | 29.7        | 33.7        | 38.1        | 39.2        | 85.4        | 35.4        | 85.1        | 61.1        | 32.8        | 84.1        | 45.6        | 46.9        | 0.0        | 34.2        | 44.5        | 50.5        |
| PIT [16]        | 87.5        | 43.4        | 78.8        | 31.2        | 30.2        | 36.3        | 39.9        | 42.0        | 79.2        | 37.1        | 79.3        | 65.4        | 37.5        | 83.2        | 46.0        | 45.6        | 25.7       | 23.5        | 49.9        | 50.6        |
| <b>Our STDA</b> | <b>88.4</b> | <b>50.8</b> | <b>82.7</b> | <b>39.4</b> | <b>24.9</b> | <b>34.6</b> | <b>43.7</b> | <b>46.6</b> | <b>84.3</b> | <b>38.6</b> | <b>81.7</b> | <b>61.3</b> | <b>41.9</b> | <b>77.8</b> | <b>50.4</b> | <b>39.0</b> | <b>5.4</b> | <b>40.3</b> | <b>53.2</b> | <b>51.9</b> |

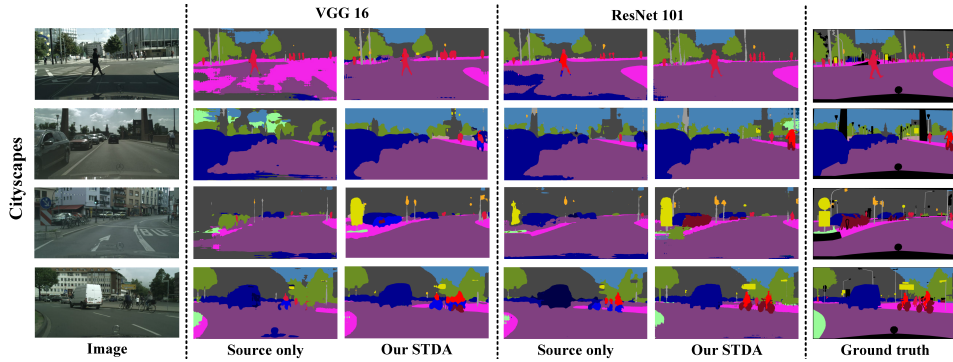

(a)

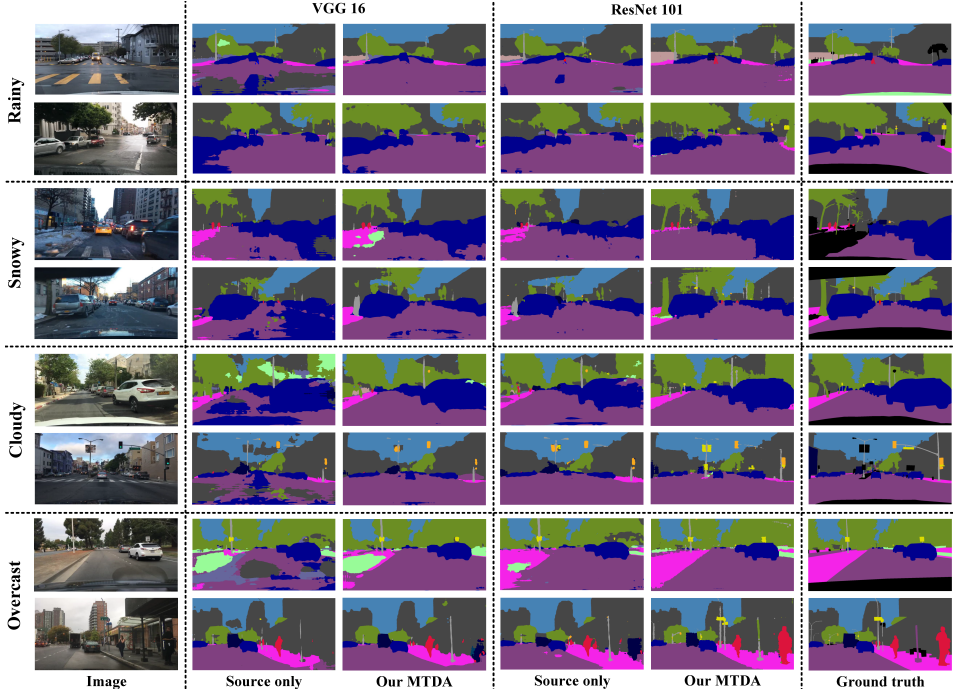

(b)

Figure 1: Qualitative results of source only model and our method using VGG16 and ResNet101 backbones. (a) Single-target domain adaptation (i.e. GTA5→Cityscapes), and (b) multi-target domain adaptation (i.e. GTA5→C-Driving).

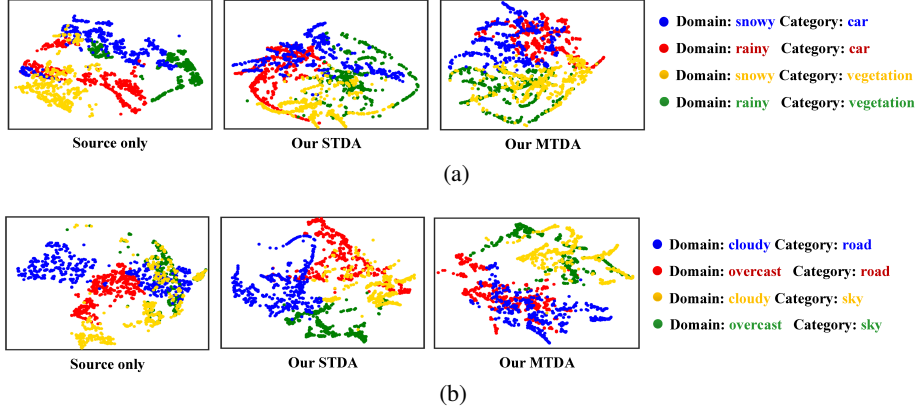

Figure 2: Comparison of feature space from source only, our STDA and MTDA models. In (a) and (b), the representations of different categories on different domains are mapped to 2-D space via the t-SNE toolbox.

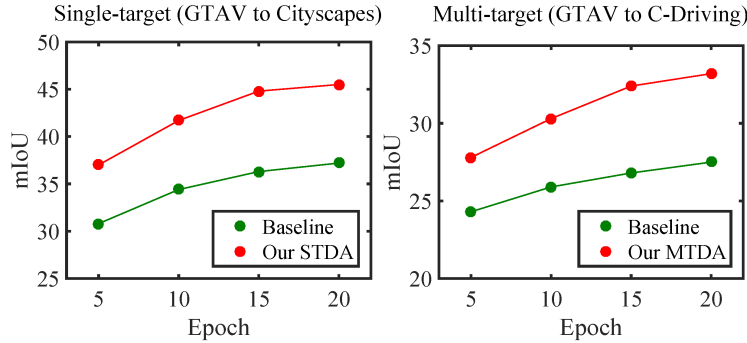

Figure 3: Effect of the image translation quality on domain adaptive semantic segmentation. The x-axis indicates the training stages of image translation model, and the y-axis is the performance of domain adaptation using the latent data from different image translation models.

### 32 A.2 Contrastive Analysis on t-SNE Visualization Results

33 Following [3, 17], we use the t-SNE [18] to map the high-dimensional features learned from different  
 34 models to a 2-D space shown in Figure 2. From the results, we have the following observations: (1)  
 35 *The feature distributions of different categories are better distinguished in our STDA and MTDA*  
 36 *than that in source only model.* Compared to the source only model, our STDA and MTDA learn  
 37 more discriminative representations for different categories, yielding more accurate predictions for  
 38 semantic segmentation. (2) *The feature distributions of different domains are better aligned in*  
 39 *MTDA than that in STDA.* Compared to STDA, our MTDA enforces the alignment of domain-level  
 40 representations during outer-level optimization, yields more generalized domain-invariant features.

### 41 A.3 Study the Effect of Image Translation on Domain Adaptation

42 We conduct an experiment to study the effect of image-to-image translation model on domain  
 43 adaptation. For different image translation methods, the performance of image translation is hard  
 44 to evaluate by a standard metric. However, for a specific image translation method (e.g. the PCE  
 45 model [15] used in our method), the translation performance is assumed to improve over training.  
 46 In Figure 3, we provide the performance of domain adaptation at different training phase of PCE,  
 47 where the baseline method directly performs domain adaptation without meta-learning on the pair of  
 48 “latent→target”.

49 From the results in Figure 3, we have two observations: (1) With the training of image translation  
 50 continues, the performance of image translation becomes better, promoting the performance of

51 different domain adaptation methods. (2) The performance gain of our method compared to baseline  
52 model is consistent, demonstrating the robustness of our method that utilizes augmented latent images  
53 from different image translation models.

#### 54 **A.4 Discussion**

55 The limitations of our proposed method lie in the following two aspects: (1) Although the inference  
56 time of our method is similar to previous works when using the same backbone network, our method  
57 costs more time to train the meta-learning framework (roughly takes 8 hours for each epoch during  
58 the STDA training). (2) As discussed in Section A.3, different image translation methods affects the  
59 performance of domain adaptation, and thus we rely on a strong image translation method to achieve  
60 good performance.

61 To reproduce our main experimental results, we release the code at: Code link. The experimental  
62 environments are listed as follows:

- 63 • Ubuntu 16.04 environment (Python 3.6, CUDA10.0, CuDNN7)
- 64 • PyTorch=1.2.0 installed following the official instructions (<https://pytorch.org>)
- 65 • Dependencies: pip install opencv-python/tqdm/yacs>=0.1.5

#### 66 **References**

- 67 [1] K. He, X. Zhang, S. Ren, and J. Sun. Deep residual learning for image recognition. In *Proc. IEEE Conf.*  
68 *Comput. Vis. Pattern Recognit. (CVPR)*, pages 770–778, 2016.
- 69 [2] Z. Liu, Z. Miao, X. Pan, X. Zhan, D. Lin, S. X. Yu, and B. Gong. Open compound domain adaptation. In  
70 *Proc. IEEE Conf. Comput. Vis. Pattern Recognit. (CVPR)*, pages 12403–12412, 2020.
- 71 [3] K. Park, S. Woo, I. Shin, and I. S. Kweon. Discover, hallucinate, and adapt: Open compound domain  
72 adaptation for semantic segmentation. In *Proc. Conf. Neural Information Processing Systems (NeurIPS)*,  
73 2020.
- 74 [4] M. N. Subhani, and M. Ali. Learning from scale-invariant examples for domain adaptation in semantic  
75 segmentation. In *Proc. Eur. Conf. Comput. Vis. (ECCV)*, pages 290–306, 2020.
- 76 [5] G. Kang, Y. Wei, Y. Yang, Y. Zhuang, and A. G. Hauptmann. Pixel-level cycle association: A new  
77 perspective for domain adaptive semantic segmentation. In *Proc. Conf. Neural Information Processing*  
78 *Systems (NeurIPS)*, 2020.
- 79 [6] Y. Li, L. Yuan, and N. Vasconcelos. Bidirectional learning for domain adaptation of semantic segmentation.  
80 In *Proc. IEEE Conf. Comput. Vis. Pattern Recognit. (CVPR)*, pages 6936–6945, 2019.
- 81 [7] J. Huang, S. Lu, D. Guan, X. Zhang. Contextual-relation consistent domain adaptation for semantic  
82 segmentation. In *Proc. Eur. Conf. Comput. Vis. (ECCV)*, pages 705–722, 2020.
- 83 [8] Z. Wang, M. Yu, Y. Chao, R. Feris, J. Xiong, W. M. Hwu, T. S. Huang, and H. Shi. Differential treatment  
84 for stuff and things: A simple unsupervised domain adaptation method for semantic segmentation. In *Proc.*  
85 *IEEE Conf. Comput. Vis. Pattern Recognit. (CVPR)*, pages 12632–12641, 2020.
- 86 [9] J. Yang, W. An, S. Wang, X. Zhu, C. Yan, and J. Huang. Label-driven reconstruction for domain adaptation  
87 in semantic segmentation. In *Proc. Eur. Conf. Comput. Vis. (ECCV)*, pages 480–498, 2020.
- 88 [10] G. Li, G. Kang, W. Liu, Y. Wei, and Y. Yang. Content-consistent matching for domain adaptive semantic  
89 segmentation. In *Proc. Eur. Conf. Comput. Vis. (ECCV)*, pages 440–456, 2020.
- 90 [11] H. Wang, T. Shen, W. Zhang, L.-Y. Duan, and T. Mei. Classes matter: A fine-grained adversarial approach  
91 to cross-domain semantic segmentation. In *Proc. Eur. Conf. Comput. Vis. (ECCV)*, pages 642–659, 2020.
- 92 [12] M. Kim, and H. Byun. Learning texture invariant representation for domain adaptation of semantic  
93 segmentation. In *Proc. IEEE Conf. Comput. Vis. Pattern Recognit. (CVPR)*, pages 12972–12981, 2020.
- 94 [13] Q. Zhang, J. Zhang, W. Liu, and D. Tao. Category anchor-guided unsupervised domain adaptation for  
95 semantic segmentation. In *Proc. Conf. Neural Information Processing Systems (NeurIPS)*, pages 433–443,  
96 2019.
- 97 [14] Y. Yang, and S. Soatto. FDA: Fourier domain adaptation for semantic segmentation. In *Proc. IEEE Conf.*  
98 *Comput. Vis. Pattern Recognit. (CVPR)*, pages 4084–4094, 2020.
- 99 [15] Y. Yang, D. Lao, G. Sundaramoorthi, and S. Soatto. Phase consistent ecological domain adaptation. In  
100 *Proc. IEEE Conf. Comput. Vis. Pattern Recognit. (CVPR)*, pages 9008–9017, 2020.

- 101 [16] F. Lv, T. Liang, X. Chen, and G. Lin. Cross-domain semantic segmentation via domain-invariant interactive  
102 relation transfer. In *Proc. IEEE Conf. Comput. Vis. Pattern Recognit. (CVPR)*, pages 4333–4342, 2020.
- 103 [17] Y. Luo, L. Zheng, T. Guan, J. Yu, and Y. Yang. Taking a closer look at domain shift: Category-level  
104 adversaries for semantics consistent domain adaptation. In *Proc. IEEE Conf. Comput. Vis. Pattern Recognit.*  
105 *(CVPR)*, pages 2507–2516, 2019.
- 106 [18] L. v. d. Maaten, and G. E. Hinton. Visualizing data using t-sne. *Journal of machine learning research*,  
107 9(Nov): 2579-2605, 2008.
